# Supplementary material for: Nintedanib Is Active in Malignant Pleural Mesothelioma Cell Models and Inhibits Angiogenesis and Tumor Growth In Vivo
Source: Oxford University Press journal article supplement (doi:10.1158/1078-0432.ccr-17-1507), 2018-05-03
Supplement: 10780432ccr171507-sup-183935_3_supp_4704371_p7hjzv.xlsx [file 10780432ccr171507-sup-183935_3_supp_4704371_p7hjzv.xlsx]

## Sheet: Munka1
Supplementary Table S1. Histological subtypes, drug sensitivitiy data and copy number changes of target RTKs in MPM cell lines
	Histological subtype	Source	Cell culture medium	Nintedanib IC50 (µM)	Cisplatin IC50 (µM)	VEGFR2		PDGFRA		PDGFRB		FGFR1
						copy number
						log2 ratio	status	log2 ratio	status	log2 ratio	status	log2 ratio	status
control cells
NP1	normal mesothelial cell	Institute of Cancer Research, Medical University of Vienna	RPMI+10% FCS	-	-		-		-		-		-
NP2	normal mesothelial cell	Institute of Cancer Research, Medical University of Vienna	RPMI+10% FCS	-	-		-		-		-		-
NP3	normal mesothelial cell	Division of Thoracic Surgery, Medical University of Vienna	RPMI+10% FCS	-	-		-		-		-		-
Met5a/CRL-9444	immortalized mesothelial cell	ATCC	DMEM+10% FCS	-	-		-		-		-		-
MPM cells
p31	epithelioid MPM	Prof. K. Grankvist, University of Umea	DMEM+10% FCS	1.9	4.3	-0.13	normal	-0.24	loss	0.03	normal	-0.41	loss
I2	epithelioid MPM	Prof. A. Catania, University of Milano	RPMI+10% FCS	3.3	3.8	-0.00	normal	0.28	gain	-0.08	normal	-0.09	normal
VMC6	epithelioid MPM	Institute of Cancer Research, Medical University of Vienna	RPMI+10% FCS	4.5	3.0	-0.09	normal	-0.85	loss	0.49	gain	0.18	normal
VMC12	epithelioid MPM	Institute of Cancer Research, Medical University of Vienna	RPMI+10% FCS	2.4	1.1	-0.48	loss	-0.18	normal	0.39	gain	0.00	normal
VMC20	epithelioid MPM	Institute of Cancer Research, Medical University of Vienna	RPMI+10% FCS	4.5	1.1	-0.49	loss	-0.16	normal	0.11	normal	0.01	normal
VMC23	epithelioid MPM	Institute of Cancer Research, Medical University of Vienna	RPMI+10% FCS	2.9	6.4	-0.38	loss	-0.28	loss	-0.01	normal	0.32	gain
VMC28	epithelioid MPM	Institute of Cancer Research, Medical University of Vienna	RPMI+10% FCS	4.5	4.2	-0.22	loss	-0.85	loss	0.55	gain	0.09	normal
Meso103	epithelioid MPM	Division of Thoracic Surgery, Medical University of Vienna	RPMI+10% FCS	4.7	3.1	-0.21	loss	-0.27	loss	-0.45	loss	0.30	gain
Meso110	epithelioid MPM	Division of Thoracic Surgery, Medical University of Vienna	RPMI+10% FCS	3.7	10	-0.83	loss	-0.62	loss	0.05/-0.56	normal / loss	0.58	gain
Meso189	epithelioid MPM	Division of Thoracic Surgery, Medical University of Vienna	RPMI+10% FCS	1.7	2.2	0.03	normal	-0.07	normal	0.23	gain	0.20	gain
Meso62	sarcomatoid MPM	Division of Thoracic Surgery, Medical University of Vienna	RPMI+10% FCS	2.2	4.1	-0.12	normal	-0.17	normal	-0.49	loss	0.04	normal
Meso80	sarcomatoid MPM	Division of Thoracic Surgery, Medical University of Vienna	RPMI+10% FCS	4.0	0.6	-0.12	normal	-0.01	normal	-0.03	normal	-0.66	loss
Meso100	sarcomatoid MPM	Division of Thoracic Surgery, Medical University of Vienna	RPMI+10% FCS	3.9	1.9	-0.48	loss	-0.16	normal	-0.69	loss	0.08	normal
SPC111	biphasic MPM	Prof. R. Stahel, University of Zurich	RPMI+10% FCS	5.9	0.7	0.47	gain	0.36	gain	-0.01	normal	-0.36	loss
SPC212	biphasic MPM	Prof. R. Stahel, University of Zurich	RPMI+10% FCS	2.0	1.9	-0.49	loss	-0.63	loss	0.06	normal	0.54	gain
M38K	biphasic MPM	Prof. V.L. Kinnula, University of Helsinki	DMEM+10% FCS	2.3	1.8	0.32	gain	0.24	gain	-0.36	loss	0.17	normal
VMC40	biphasic MPM	Institute of Cancer Research, Medical University of Vienna	RPMI+10% FCS	2.4	3.7	-0.23	loss	-0.28	loss	0.15	normal	0.52	gain
VMC46	biphasic MPM	Institute of Cancer Research, Medical University of Vienna	RPMI+10% FCS	3.4	0.4	-0.92	loss	-0.66	loss	0.15	normal	-0.64	loss
VMC48	biphasic MPM	Institute of Cancer Research, Medical University of Vienna	RPMI+10% FCS	1.6	1.2	-0.11	normal	-0.31	loss	0.86/-0.33	gain / loss	-0.12	normal
Meso92	biphasic MPM	Division of Thoracic Surgery, Medical University of Vienna	RPMI+10% FCS	3.2	1.9	0.00	normal	-0.06	normal	1.10	ampl	-0.02	normal
